# Supplementary material for: Endophytic Fungal Community of Huperzia serrata: Diversity and Relevance to the Production of Huperzine A by the Plant Host
Source: PubMed Central journal article supplement (PMC7914787; doi:10.3390/molecules26040892), 2021-02-08
Supplement: molecules-26-00892-s001.pdf [file molecules-26-00892-s001.pdf]

**Table 1.** Identity of the endophytes from *H. serrata* by the ITS sequences analysis

| Isolate (GenBank Acc. No.) | Identity to the closest species (GenBank Acc.No.)          |
|----------------------------|------------------------------------------------------------|
| HS50-1 (MK424463)          | 99% to <i>Colletotrichum gloeosporioides</i> (KC010549.1)  |
| HS25-12 (MK424449)         | 99% to <i>Colletotrichum gloeosporioides</i> (KC010549.1)  |
| HS11-1 (MK424446)          | 100% to <i>Colletotrichum gloeosporioides</i> (KC010549.1) |
| HS3-10-2 (MK424423)        | 99% to <i>Colletotrichum gloeosporioides</i> (KC010549.1)  |
| HS38-12-2 (MK424409)       | 100% to <i>Colletotrichum gloeosporioides</i> (KC010549.1) |
| HS25-5-1 (MK424406)        | 100% to <i>Colletotrichum gloeosporioides</i> (KC010549.1) |
| HS11-1-3 (MK424405)        | 100% to <i>Colletotrichum gloeosporioides</i> (KC010549.1) |
| HL38-12-2 (MK629743)       | 100% to <i>Colletotrichum gloeosporioides</i> (KC010549.1) |
| HL33-12-3 (MK424400)       | 99% to <i>Colletotrichum gloeosporioides</i> (KC010549.1)  |
| HS46-2-3 (MK424428)        | 100% to <i>Colletotrichum boninense</i> (FJ968604.1)       |
| HS1-4 (MK424418)           | 100% to <i>Colletotrichum boninense</i> (FJ968604.1)       |
| HL33-6-1 (MK424419)        | 100% to <i>Colletotrichum boninense</i> (FJ968604.1)       |
| HS7-4 (MK424424)           | 100% to <i>Colletotrichum boninense</i> (FJ968604.1)       |
| HS7-1 (MK424444)           | 100% to <i>Colletotrichum boninense</i> (FJ968604.1)       |
| HL31-6-2 (MK424450)        | 100% to <i>Colletotrichum boninense</i> (FJ968604.1)       |
| HL34-8-1 (MK424458)        | 100% to <i>Colletotrichum boninense</i> (FJ968604.1)       |
| HL30-4-3 (MK424464)        | 100% to <i>Colletotrichum boninense</i> (FJ968604.1)       |
| HL38-14-5 (MK424460)       | 100% to <i>Colletotrichum dematium</i> (AB455254.1)        |
| HL26-24-1 (MK424411)       | 100% to <i>Colletotrichum tabaci</i> (JQ005763.1)          |
| HL30-4-2 (MK424398)        | 100% to <i>Colletotrichum acutata</i> (KR180397.1)         |
| HL33-12-2 (MK424467)       | 99% to <i>Fusarium lateritium</i> (KX494872.1)             |
| HL32-4-1 (MK424399)        | 99% to <i>Pseudocercospora rubi</i> (MH855672.1)           |
| HL32-4-5 (MK424414)        | 99% to <i>Pseudocercospora rubi</i> (JX436789.1)           |
| HS1-4-6 (MK629744)         | 100% to <i>Guignardia mangiferae</i> (JX436789.1)          |
| HL36-4-1 (MK424402)        | 100% to <i>Leptostroma</i> sp. (KC354586.1)                |
| HS8-3 (MK424404)           | 100% to <i>Leptostroma</i> sp. (KC354586.1)                |
| HL37-4-1 (MK629745)        | 99% to <i>Arthopyreniaceae</i> sp. (JN253508.1)            |
| HL37-4-2 (MK424403)        | 100% to <i>Arthopyreniaceae</i> sp. (JN253508.1)           |
| HS8-2-3 (MK424445)         | 100% to <i>Microsphaeropsis arundinis</i> (KX510124.1)     |

---

|                     |                                                  |
|---------------------|--------------------------------------------------|
| HL34-2-6 (MK424436) | 100% to <i>Alternaria alternat</i> (KT345696.1)  |
| HL36-9-1 (MK424439) | 100% to <i>Alternaria alternata</i> (KT345696.1) |
| HR38-4 (MK424432)   | 100% to <i>Alternaria alternata</i> (KT345696.1) |
| HL34-2-5 (MK424421) | 99% to <i>Alternaria alternata</i> (KT345696.1)  |
| HR38-7 (MK424417)   | 99% to <i>Alternaria alternata</i> (KT345696.1)  |
| HR38-3 (MK424416)   | 99% to <i>Alternaria alternata</i> (KT345696.1)  |
| HL34-2-2 (MK424401) | 99% to <i>Alternaria alternata</i> (KT345696.1)  |
| HL36-9-3 (MK629746) | 100% to <i>Epicoccum nigrum</i> (MK370650.1)     |
| HS45-14 (MK424410)  | 100% to <i>Phoma herbarum</i> (MK370675.1)       |
| HL31-5 (MK424412)   | 100% to <i>Phoma herbarum</i> (MK370675.1)       |
| HS36-1-2 (MK424408) | 99% to <i>phoma herbarum</i> (MK370675.1)        |
| HS33-3-1 (MK424426) | 99% to <i>phoma herbarum</i> (MK370675.1)        |
| HL38-14 (MK424429)  | 99% to <i>phoma herbarum</i> (MK370675.1)        |
| HS26-2 (MK424434)   | 99% to <i>phoma herbarum</i> (MK370675.1)        |
| HS33-2 (MK424454)   | 99% to <i>phoma herbarum</i> (MK370675.1)        |
| HS36-8 (MK424456)   | 99% to <i>phoma herbarum</i> (MK370675.1)        |
| HL45-6 (MK424461)   | 99% to <i>phoma herbarum</i> (MK370675.1)        |
| HS35-9-1 (MK424407) | 99% to <i>Bjerkandera adusta</i> (MH815138.1)    |
| HL36-6 (MK424438)   | 100% to <i>Bjerkandera adusta</i> (MH815138.11)  |
| HS39-18 (MK424435)  | 100% to <i>Trametes versicolor</i> (KY628332.1)  |
| HR43-5 (MK424443)   | 100% to <i>Trametes versicolor</i> (KY628332.1)  |

---

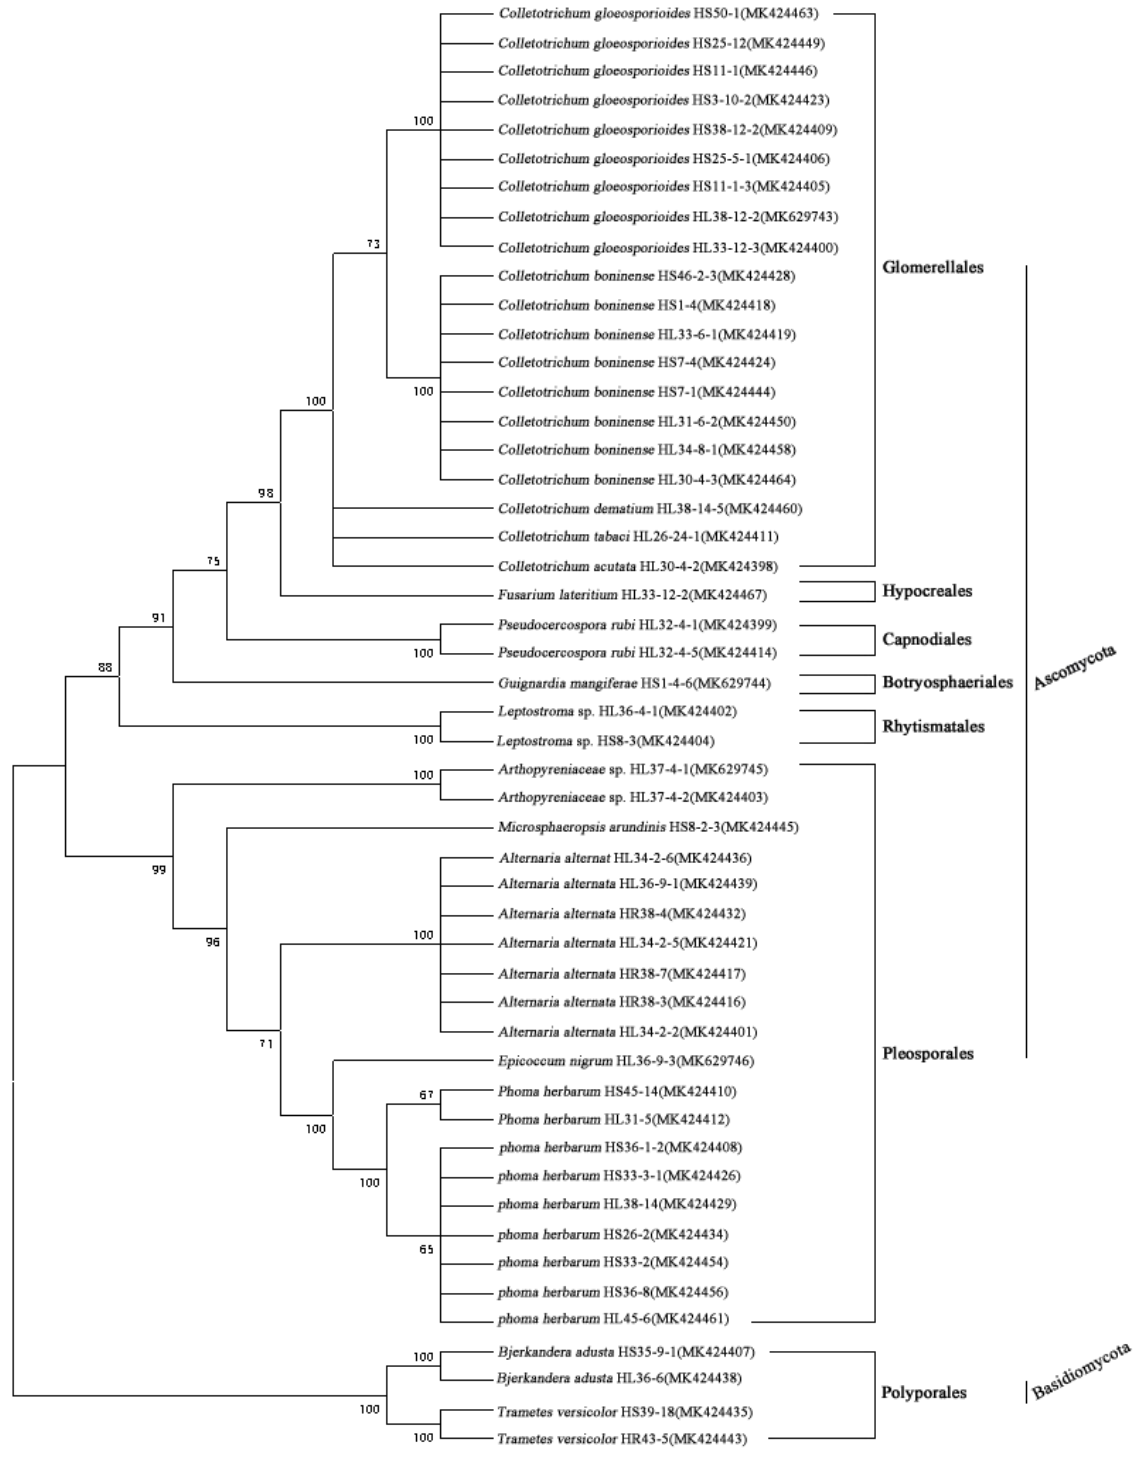

**Figure 1.** Phylogenetic tree based on ITS sequences of 50 endophytic fungi in *H. serrata*

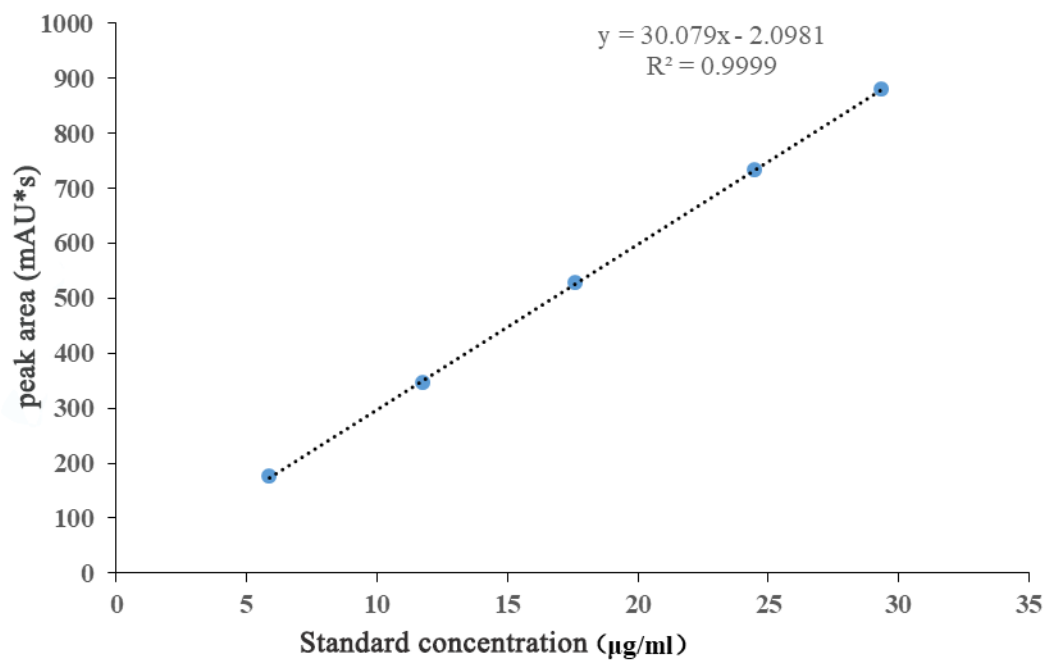

**Figure 1.** Standard HupA linear equation
